# Supplementary material for: NTRK1/TrkA Activation Overrides the G2/M-Checkpoint upon Irradiation
Source: MDPI journal article supplement (doi:10.3390/cancers13236023), 2021-11-30
Supplement: s1 [file s1]

# Supplementary Figures to : NTRK1/TrkA activation overrides the G<sub>2</sub>/M-checkpoint upon irradiation

Christina Hassiepen, Aashish Soni, Ines Rudolf, Vivian Boron, Sebastian Oeck, George Iliakis and Alexander Schramm

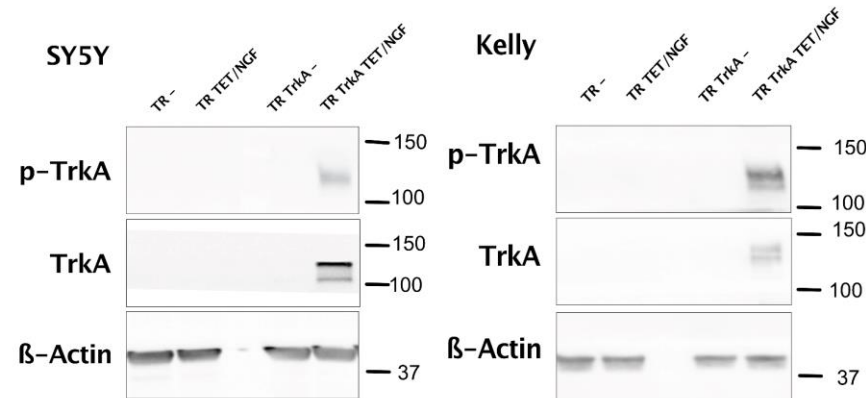

**Figure S1.** Western Blots corresponding to Figure 1C and 1D including molecular weight markers.

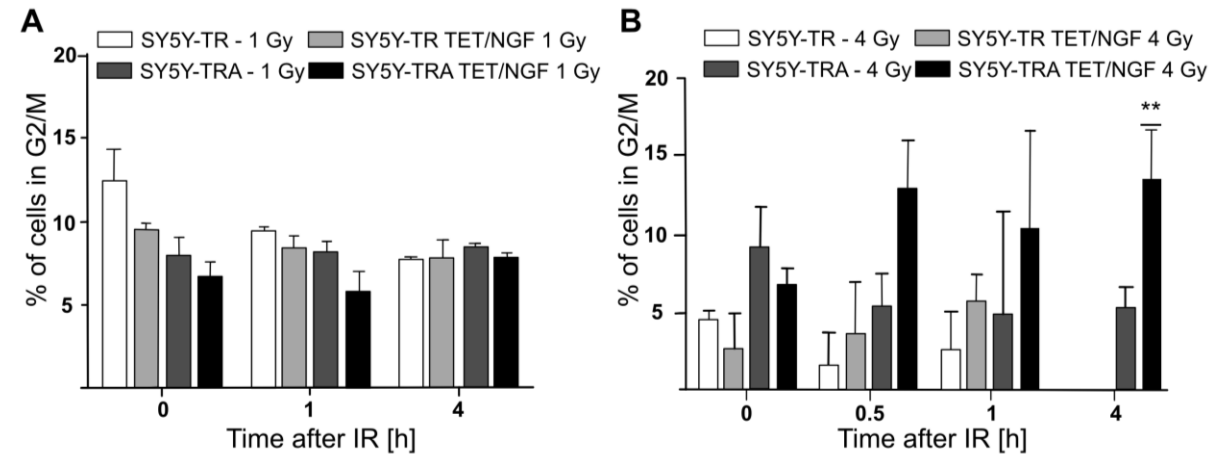

**Figure S2.** Activation of TrkA/NTRK1 increases the fraction of cells in G2/M phase after high-dose irradiation (4 Gy) in SY5Y-TRA. The cell cycle was analyzed by FACS and PI-staining in SY5Y cells with and without TET/NGF treatment. Cells were irradiated with [A] 1 Gy or [B] 4 Gy. Error bars show the SEM from three independent experiments.

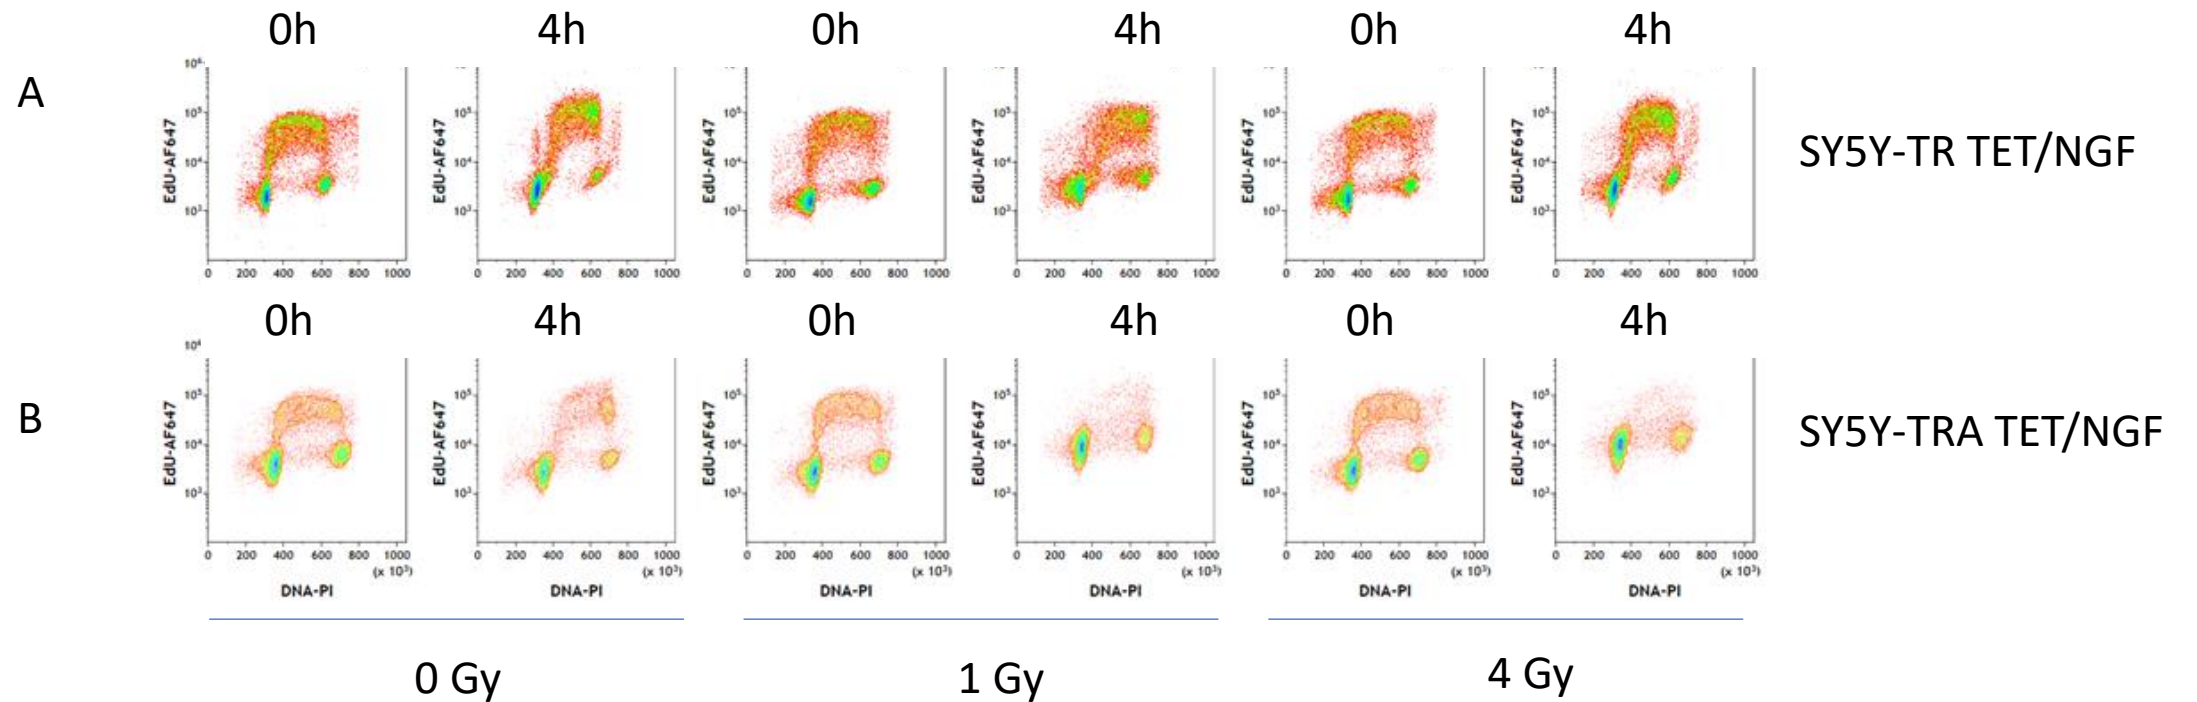

**Figure S3.** Edu pulse labelling confirms transition of irradiated S-phase cells into the G2 phase within 4 h post IR. Two parametric FACS histograms for (A) SY5Y-TR and (B) SY5Y-TRA cells treated with TET/NGF and measured at 0 or 4 h post IR. Cells were pulse-labeled with 10  $\mu$ M of 5-Ethynyl-2'-deoxyuridine (EdU) for 15 min and then irradiated as indicated. DNA was stained using Propidium iodide (DNA-PI) plus RNAase solution for 15 min at RT.

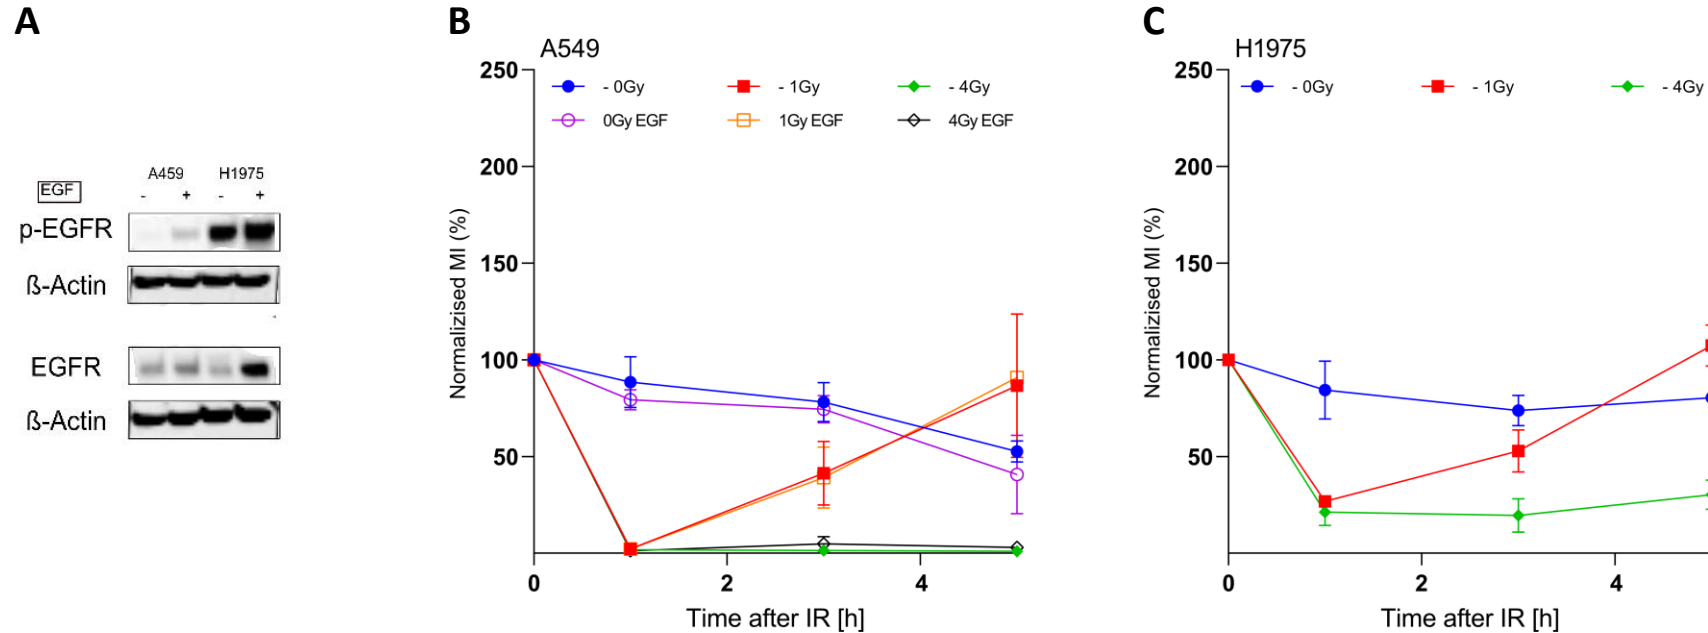

**Figure S4.** (A) EGFR phosphorylation is induced by EGF in A549 cells with wild-type EGFR, while H1975 cells bearing an activating mutation in the EGFR receptor present with EGFR auto-phosphorylation. (B, C) EGFR activation by its ligand, EGF, does not affect the G2-checkpoint upon irradiation. Analyses of the mitotic index (MI) of [A] A549 and [B] H1975 after irradiation with 1 Gy and 4 Gy. Error bars show the SEM from three independent experiments.

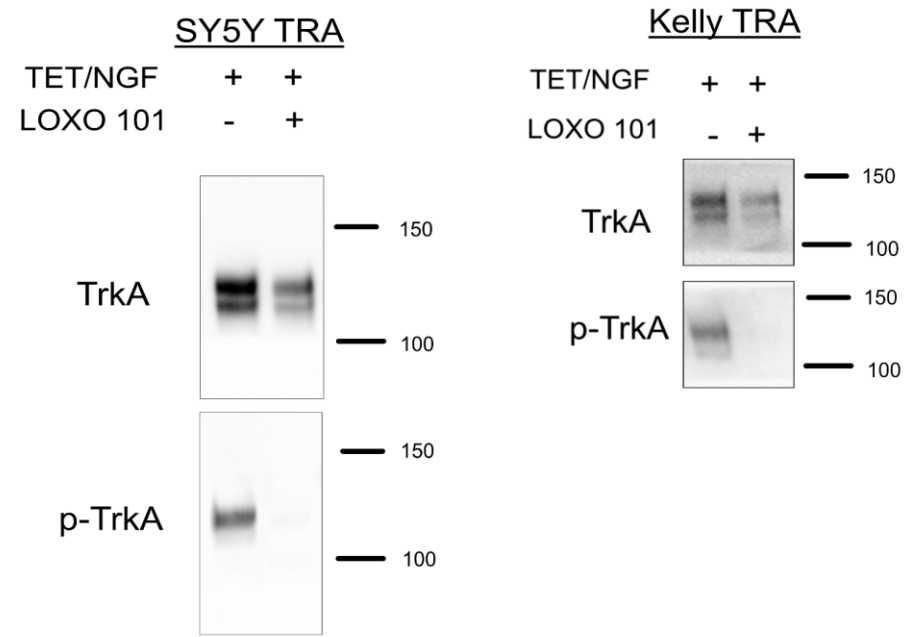

**Figure S5.** Western Blots corresponding to Figure 3A including molecular weight markers.

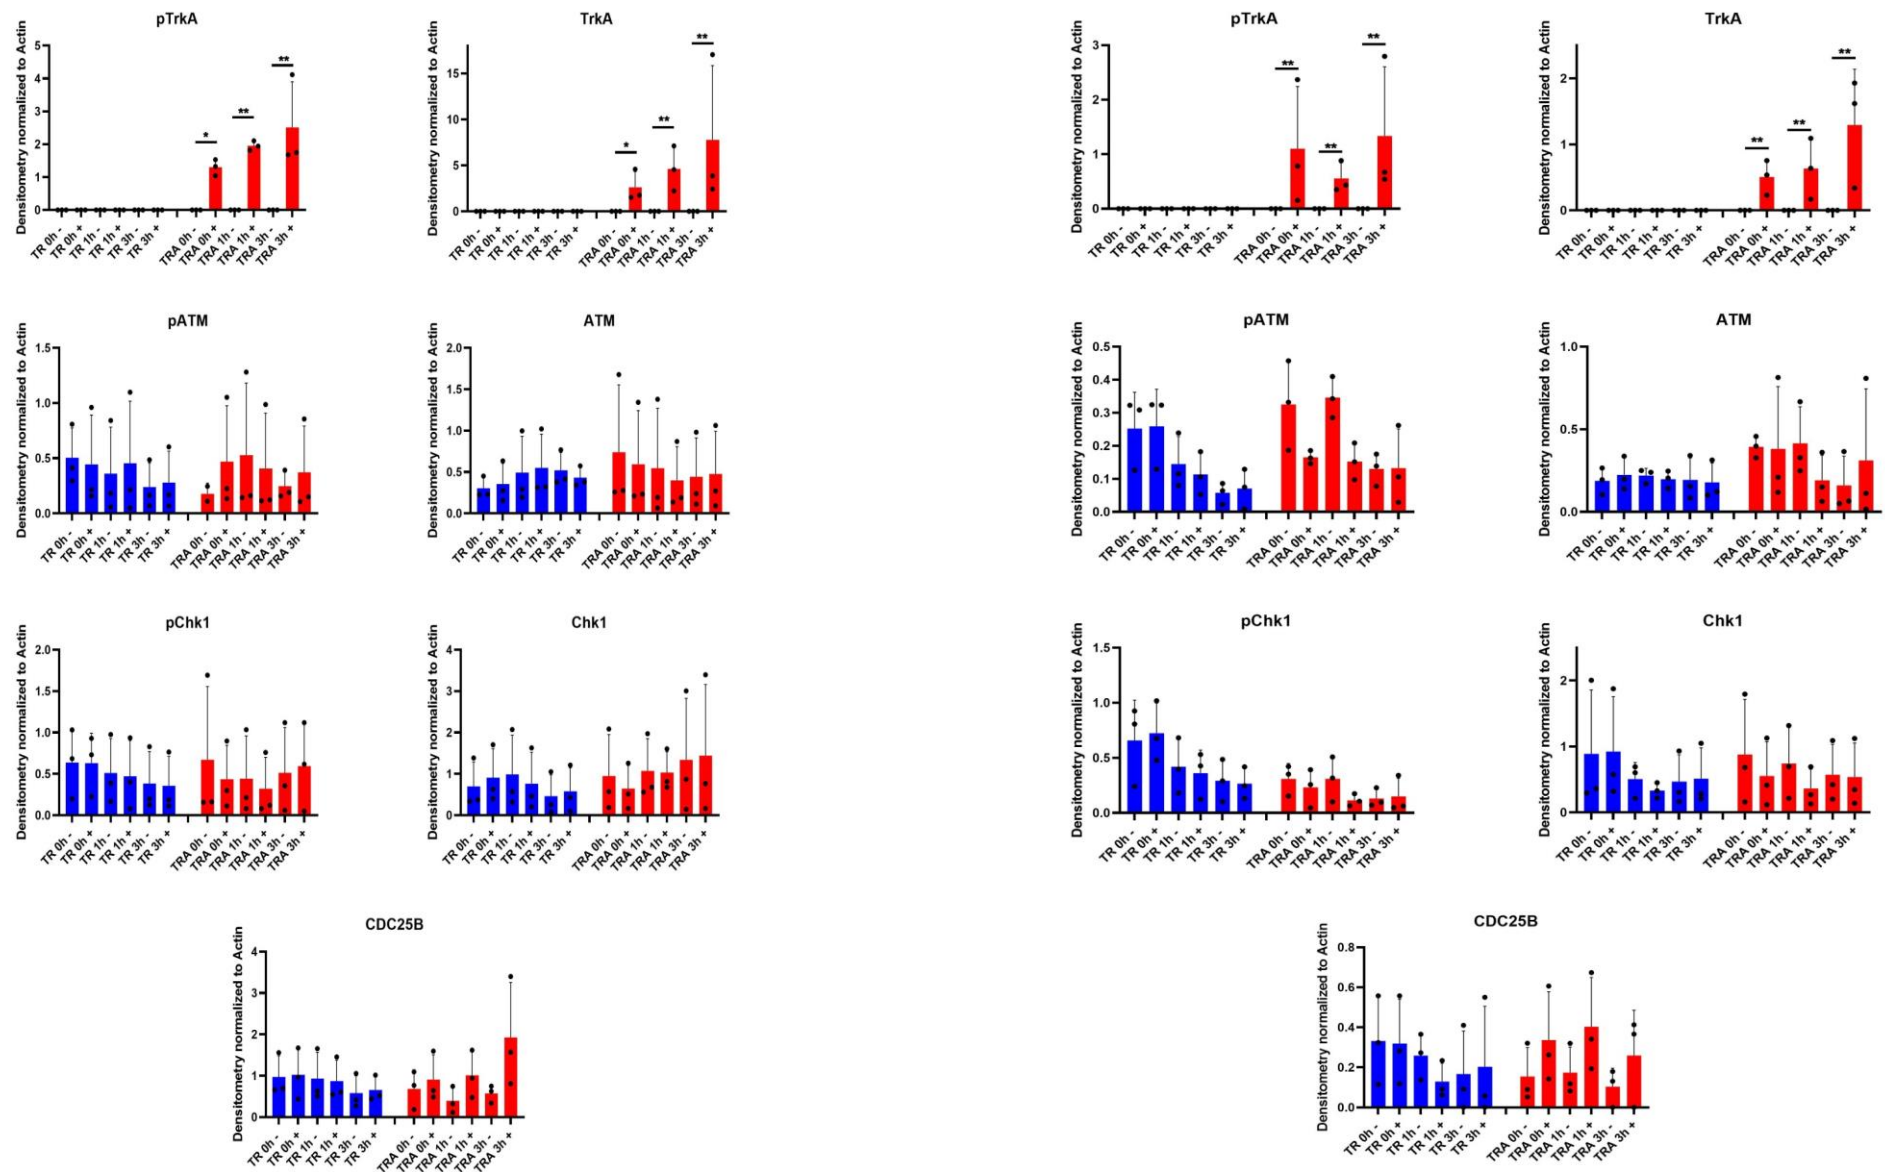

**Figure S6.** Densitometric analyses of aggregated Western Blot data (n=3) from Fig. 5A. Left: SY5Y control cells (TR) or SY5Y cells with inducible expression of TrkA/NTRK1 (TRA) were used. Right: Kelly control cells (TR) or Kelly cells with inducible expression of TrkA/NTRK1 (TRA) were used. Cells were treated with TET/NGF (+) or not (-) and protein levels were determined by Western Blotting after irradiation at time points indicated. Protein expression was normalized to beta-Actin.

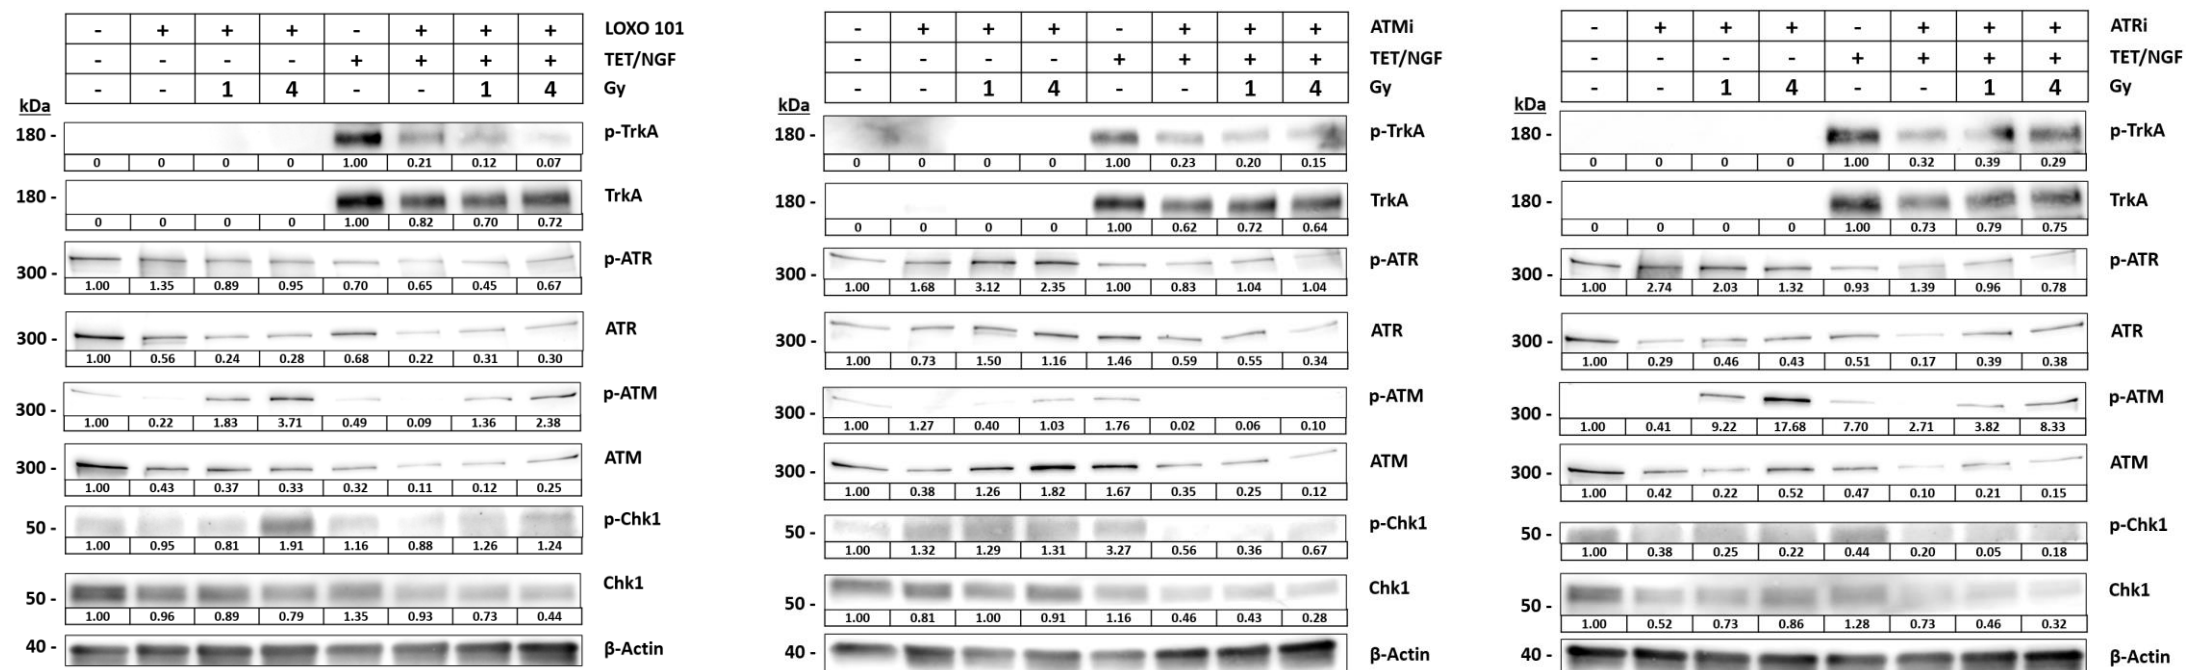

**Figure S7.** Impact of Loxo101 (left), ATMi (KU55933, middle) and ATRi (VE821, right) treatment on IR induced expression of pATM, pATR, pChk1 and pTrkA in SY5Y-TRA cells with (+TET/NGF) or without (-TET/NGF) activation and expression of TrkA. Notably, KU55933 and VE821 are known to inhibit downstream signalling (p-Chk1) rather than target phosphorylation. Samples were treated with inhibitors 1h prior to IR and collected 1h after IR at doses indicated.
