# Supplementary material for: NTRK1/TrkA Activation Overrides the G2/M-Checkpoint upon Irradiation
Source: Cancers (Basel). 2021 Nov 30;13(23):6023. doi: 10.3390/cancers13236023 (PMC8657035; doi:10.3390/cancers13236023)
Supplement: Supplementary file 1 [file cancers-13-06023-s001.zip › cancers-1455547 supplementary.xlsx]

## Sheet: Figure 2
Figure 2B
SY5Y TR
	Predicted (LS) mean diff,	95,00% CI of diff,	Significant?	Summary	Adjusted P Value
1Gy - 1Gy + NGF
0	-3.238	-17,28 to 10,80	No	ns	0.9896
1	1.55	-12,12 to 15,22	No	ns	0.9998
3	1.956	-17,37 to 21,28	No	ns	0.9999
5	4.633	-14,69 to 23,96	No	ns	0.9873
Figure 2C
SY5Y TRA	Predicted (LS) mean diff,	95,00% CI of diff,	Significant?	Summary	Adjusted P Value
1Gy - 1Gy + NGF
0	0	-33,36 to 33,36	No	ns	>0,9999
1	-62.31	-95,67 to -28,94	Yes	****	<0,0001
3	-102.6	-144,8 to -60,43	Yes	****	<0,0001
5	-59.99	-102,2 to -17,78	Yes	**	0.0024
Figure 2D
Kelly TR
	Predicted (LS) mean diff,	95,00% CI of diff,	Significant?	Summary	Adjusted P Value
1Gy - 1Gy + NGF
0	0	-31,08 to 31,08	No	ns	>0,9999
1	-6.787	-37,86 to 24,29	No	ns	0.9602
3	-7.463	-38,54 to 23,61	No	ns	0.9447
5	-69.44	-131,6 to -7,282	Yes	*	0.025
Figure 2E
Kelly TRA
	Predicted (LS) mean diff,	95,00% CI of diff,	Significant?	Summary	Adjusted P Value
1Gy - 1Gy + NGF
0	0	-25,99 to 25,99	No	ns	>0,9999
1	-43.21	-69,20 to -17,22	Yes	***	0.0004
3	-18.25	-56,61 to 20,10	No	ns	0.6286
5	-31.68	-77,53 to 14,16	No	ns	0.2772

## Sheet: Figure 3
SY5Y Loxo 101
	Predicted (LS) mean diff,	95,00% CI of diff,	Significant?	Summary	Adjusted P Value
TR 1Gy NGF LOXO 101 - TRA 1Gy NGF LOXO 101
0h	0	-16,35 to 16,35	No	ns	>0,9999
1h	-29.68	-46,03 to -13,32	Yes	***	0.0006
3h	-26.9	-43,26 to -10,55	Yes	**	0.0014
5h	-24.58	-44,61 to -4,552	Yes	*	0.014
	Predicted (LS) mean diff,	95,00% CI of diff,	Significant?	Summary	Adjusted P Value
TRA 0Gy NGF LOXO 101 - TRA 1Gy NGF LOXO 101
0h	0	-16,05 to 16,05	No	ns	>0,9999
1h	51.37	35,32 to 67,42	Yes	****	<0,0001
3h	44.05	28,00 to 60,10	Yes	****	<0,0001
5h	22.07	2,886 to 41,25	Yes	*	0.0205
Kelly Loxo 101
	Predicted (LS) mean diff,	95,00% CI of diff,	Significant?	Summary	Adjusted P Value
TR 1 Gy NGF LOXO 101 - TRA 1 Gy NGF LOXO 101
0h	0	-76,09 to 76,09	No	ns	>0,9999
1h	-11.39	-87,47 to 64,70	No	ns	0.969
3h	17.81	-58,28 to 93,89	No	ns	0.8955
	Predicted (LS) mean diff,	95,00% CI of diff,	Significant?	Summary	Adjusted P Value
TRA 0 Gy NGF LOXO 101 - TRA 1 Gy NGF LOXO 101
0h	0	-48,84 to 48,84	No	ns	>0,9999
1h	58.45	9,616 to 107,3	Yes	*	0.0184
3h	-67.78	-116,6 to -18,94	Yes	**	0.007

## Sheet: Figure 4
Figure 4 A	Cells	SY5Y TR + ATMi	SY5Y TRA + ATMi							Cells	SY5Y TRA + NGF	SY5Y TRA + ATMi
	Predicted (LS) mean diff,	95,00% CI of diff,	Significant?	Summary	Adjusted P Value					Predicted (LS) mean diff,	95,00% CI of diff,	Significant?	Summary	Adjusted P Value
SY5Y-TR - 1 Gy ATMi - SY5Y-TRA - 1 Gy ATMi									SY5Y-TRA - 1 Gy ATMi - SY5Y-TRA 1 Gy NGF
0h	0	-59,23 to 59,23	No	ns	>0,9999				0h	0	-69,40 to 69,40	No	ns	>0,9999
1h after IR	15.67	-43,56 to 74,91	No	ns	0.9233				1h after IR	22.29	-47,11 to 91,69	No	ns	0.8645
2h after IR	10.82	-48,42 to 70,05	No	ns	0.9791				2h after IR	-54.22	-123,6 to 15,18	No	ns	0.1705
3h after IR	-18.1	-88,90 to 52,69	No	ns	0.9316				3h after IR	-27.72	-107,9 to 52,41	No	ns	0.8305
Figure 4 B	Cells	SY5Y TR + ATRi	SY5Y TRA + ATRi							Cells	SY5Y TRA + NGF	SY5Y TRA + ATRi
	Predicted (LS) mean diff,	95,00% CI of diff,	Significant?	Summary	Adjusted P Value					Predicted (LS) mean diff,	95,00% CI of diff,	Significant?	Summary	Adjusted P Value
SY5Y-TR - 1 Gy ATRi - SY5Y-TRA - 1 Gy ATRi									SY5Y-TRA - 1 Gy ATRi - SY5Y-TRA 1 Gy NGF
0h	0	-33,24 to 33,24	No	ns	>0,9999				0h	0	-55,71 to 55,71	No	ns	>0,9999
1h after IR	21.74	-11,50 to 54,97	No	ns	0.3058				1h after IR	-1.4	-57,11 to 54,31	No	ns	>0,9999
2h after IR	6.033	-27,20 to 39,27	No	ns	0.9795				2h after IR	-36.03	-91,74 to 19,67	No	ns	0.3243
3h after IR	15.66	-24,06 to 55,38	No	ns	0.7459				3h after IR	-31.84	-96,16 to 32,49	No	ns	0.5764
Figure 4 C	Cells	Kelly TR + ATMi	Kelly TRA + ATMi							Cells	Kelly TRA + NGF	Kelly TRA + ATMi
	Predicted (LS) mean diff,	95,00% CI of diff,	Significant?	Summary	Adjusted P Value					Predicted (LS) mean diff,	95,00% CI of diff,	Significant?	Summary	Adjusted P Value
Kelly-TR - 1 Gy ATMi - Kelly-TRA - 1 Gy ATMi									Kelly-TRA - 1 Gy ATMi - Kelly-TRA 1 Gy NGF
0h	0	-41,06 to 41,06	No	ns	>0,9999				0h	0	-53,80 to 53,80	No	ns	>0,9999
1h after IR	-6.109	-47,17 to 34,96	No	ns	>0,9999				1h after IR	16.38	-37,42 to 70,18	No	ns	0.8081
3h after IR	11.4	-29,67 to 52,46	No	ns	>0,9999				3h after IR	17.45	-40,06 to 74,97	No	ns	0.8097
Figure 4 D
	Cells	Kelly TR + ATRi	Kelly TRA + ATRi							Cells	Kelly TRA + NGF	Kelly TRA + ATRi
	Predicted (LS) mean diff,	95,00% CI of diff,	Significant?	Summary	Adjusted P Value					Predicted (LS) mean diff,	95,00% CI of diff,	Significant?	Summary	Adjusted P Value
Kelly-TR - 1 Gy ATRi - Kelly-TRA - 1 Gy ATRi									Kelly-TRA - 1 Gy ATRi - Kelly-TRA 1 Gy NGF
0h	0	-54,64 to 54,64	No	ns	>0,9999				Row 1	0	-62,19 to 62,19	No	ns	>0,9999
1h after IR	-12.65	-67,29 to 42,00	No	ns	>0,9999				Row 2	45.92	-16,27 to 108,1	No	ns	0.1833
3h after IR	-5.84	-60,48 to 48,80	No	ns	>0,9999				Row 3	15.29	-51,19 to 81,78	No	ns	0.9047
